# Supplementary material for: Pan-drug and drug-specific mechanisms of 5-FU, irinotecan (CPT-11), oxaliplatin, and cisplatin identified by comparison of transcriptomic and cytokine responses of colorectal cancer cells
Source: PubMed Central journal article supplement (PMC8487728; doi:10.18632/oncotarget.28075), 2021-09-28
Supplement: oncotarget-12-2006-s001.pdf [file oncotarget-12-2006-s001.pdf]

# Pan-drug and drug-specific mechanisms of 5-FU, irinotecan (CPT-11), oxaliplatin, and cisplatin identified by comparison of transcriptomic and cytokine responses of colorectal cancer cells

## SUPPLEMENTARY MATERIALS

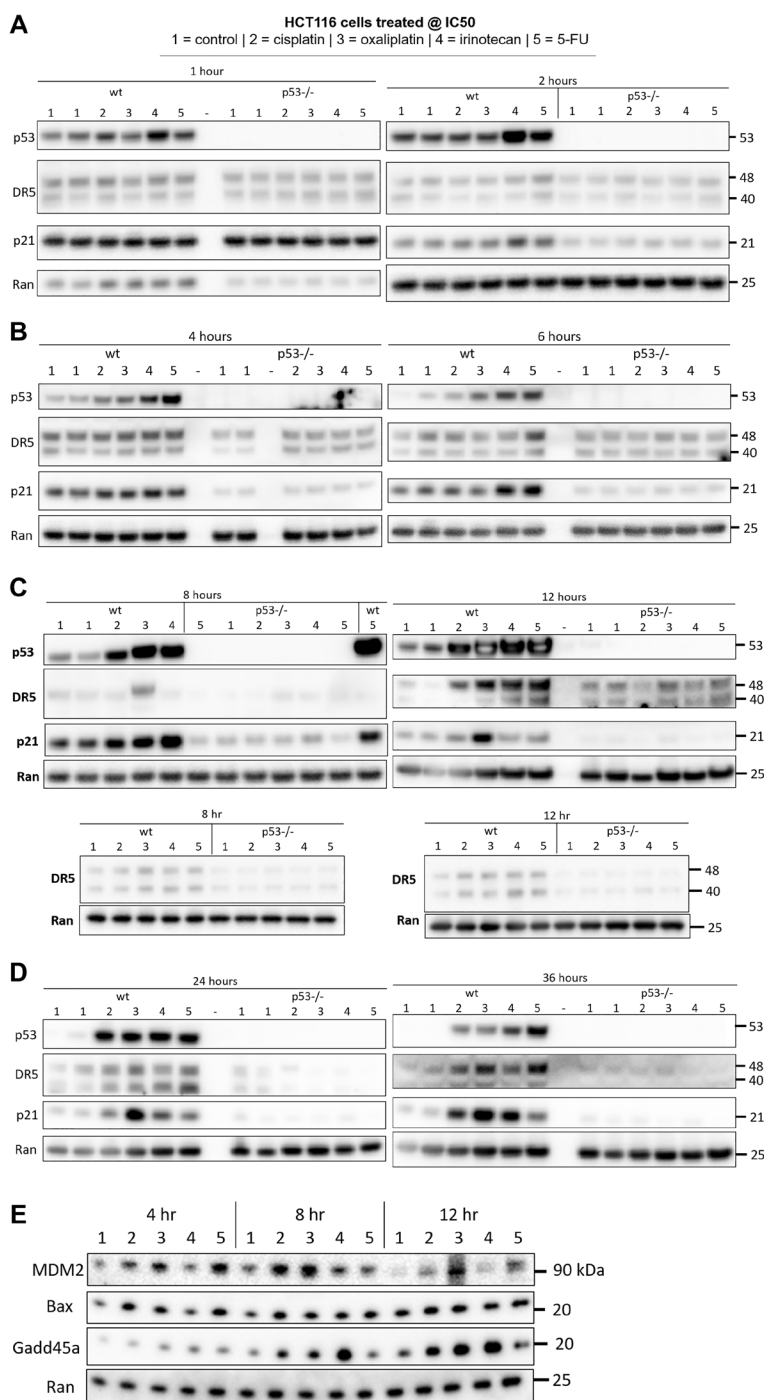

**Supplementary Figure 1: Drug-specific variability in the kinetics of the p53 response to 5-FU, CPT-11, oxaliplatin, and cisplatin in human colorectal cancer cells.** HCT116 and HCT116 p53<sup>-/-</sup> cells were treated with 5-FU, CPT-11, oxaliplatin and cisplatin at their respective IC50s for 1 hour, 2 hours (A), 4 hours, 6 hours (B), 8 hours, 12 hours (C), 24 hours, or 36 hours (D). Cells were similarly treated for 4, 8, or 12 hours in (E).

**A** **HCT116 cells treated @ IC50**  
 1 = control | 2 = cisplatin | 3 = oxaliplatin | 4 = irinotecan | 5 = 5-FU

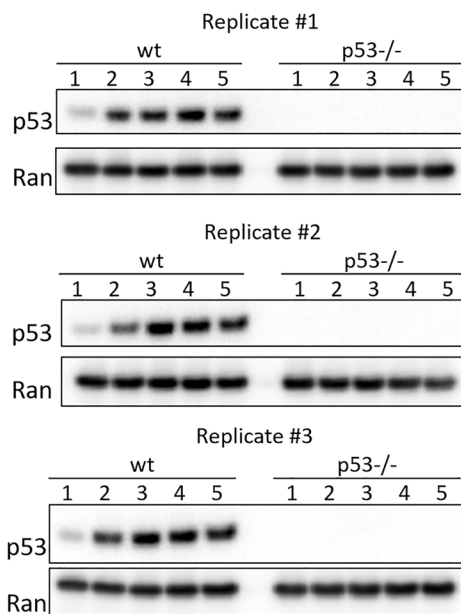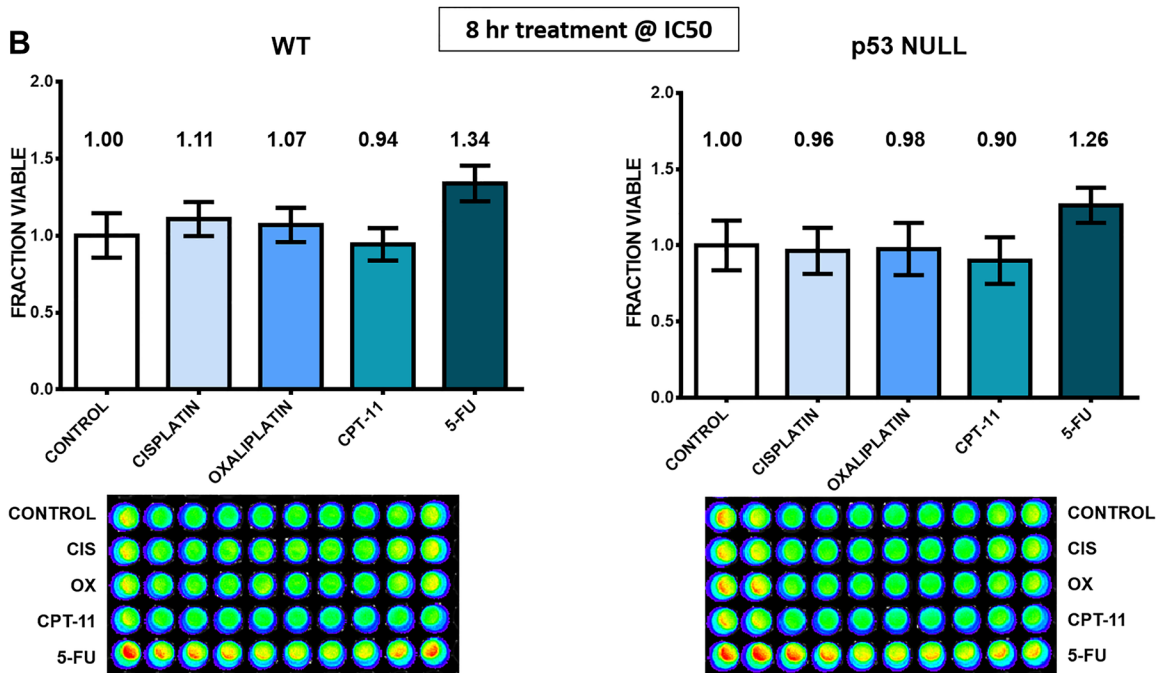

**Supplementary Figure 2: Verification of p53 induction and equal cell death in samples used for microarray analysis.** HCT116 and HCT116 p53<sup>-/-</sup> cells were treated with cisplatin, oxaliplatin, CPT-11, or 5-FU at their IC<sub>50</sub> for 8 hours. (A) Western blot demonstrated that p53 was upregulated at this time point in all three biological replicates used for microarray analysis. (B) CellTiterGlo cell viability assay confirmed that there was no induction of cell death at this time point. Edge effect was noted for 5-FU treated cells but no cleavage of PARP was noted in western blots of similarly treated samples (Figure 1, 8 hr panel).

## A Internal control genes

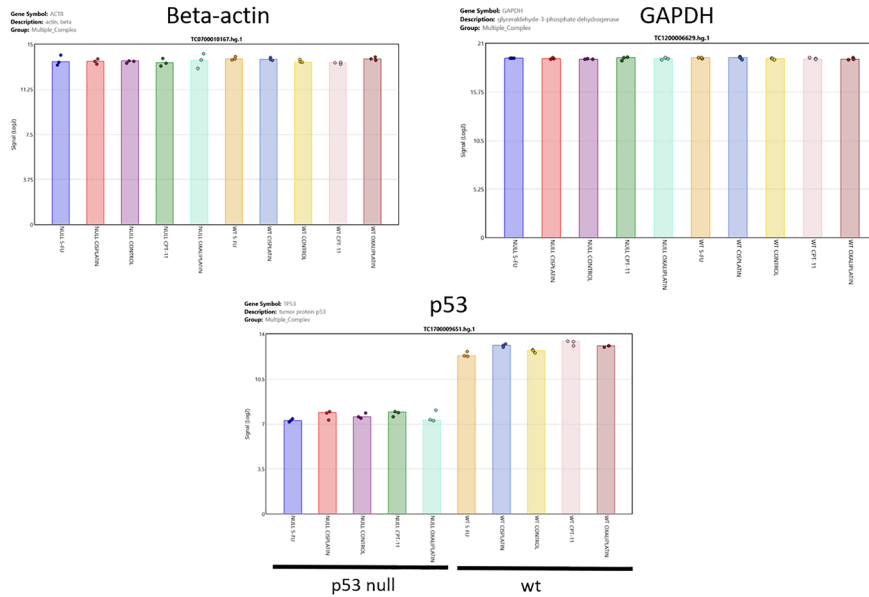

## B Sample QC Overview

| Sample # | Labeling Controls Threshold | Hybridization Controls Threshold | Pos vs Neg AUC Threshold | Condition        |
|----------|-----------------------------|----------------------------------|--------------------------|------------------|
| 27       | Out                         | Pass                             | Pass                     | NULL CONTROL     |
| 23       | Out                         | Pass                             | Pass                     | NULL OXALIPLATIN |
| 15       | Out                         | Pass                             | Pass                     | NULL OXALIPLATIN |
| 26       | Out                         | Pass                             | Pass                     | WT CPT-11        |
| 28       | Out                         | Pass                             | Pass                     | WT OXALIPLATIN   |
| 16       | Pass                        | Pass                             | Pass                     | NULL 5-FU        |
| 14       | Pass                        | Pass                             | Pass                     | NULL 5-FU        |
| 4        | Pass                        | Pass                             | Pass                     | NULL 5-FU        |
| 25       | Pass                        | Pass                             | Pass                     | NULL CISPLATIN   |
| 5        | Pass                        | Pass                             | Pass                     | NULL CISPLATIN   |
| 1        | Pass                        | Pass                             | Pass                     | NULL CISPLATIN   |
| 30       | Pass                        | Pass                             | Pass                     | NULL CONTROL     |
| 22       | Pass                        | Pass                             | Pass                     | NULL CONTROL     |
| 3        | Pass                        | Pass                             | Pass                     | NULL CPT-11      |
| 29       | Pass                        | Pass                             | Pass                     | NULL CPT-11      |
| 11       | Pass                        | Pass                             | Pass                     | NULL CPT-11      |
| 21       | Pass                        | Pass                             | Pass                     | NULL OXALIPLATIN |
| 13       | Pass                        | Pass                             | Pass                     | WT 5-FU          |
| 8        | Pass                        | Pass                             | Pass                     | WT 5-FU          |
| 2        | Pass                        | Pass                             | Pass                     | WT 5-FU          |
| 19       | Pass                        | Pass                             | Pass                     | WT CISPLATIN     |
| 9        | Pass                        | Pass                             | Pass                     | WT CISPLATIN     |
| 6        | Pass                        | Pass                             | Pass                     | WT CISPLATIN     |
| 17       | Pass                        | Pass                             | Pass                     | WT CONTROL       |
| 12       | Pass                        | Pass                             | Pass                     | WT CONTROL       |
| 10       | Pass                        | Pass                             | Pass                     | WT CONTROL       |
| 24       | Pass                        | Pass                             | Pass                     | WT CPT-11        |
| 7        | Pass                        | Pass                             | Pass                     | WT CPT-11        |
| 20       | Pass                        | Pass                             | Pass                     | WT OXALIPLATIN   |
| 18       | Pass                        | Pass                             | Pass                     | WT OXALIPLATIN   |

### Labeling controls

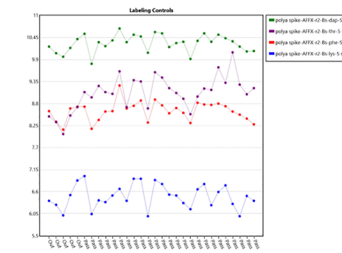

### Hybridization controls

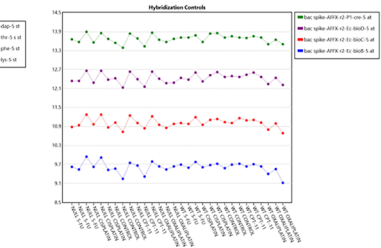

### Signal Box Plot

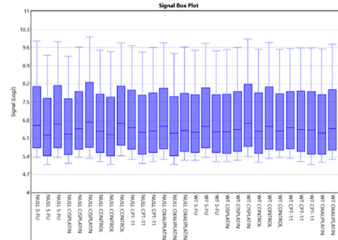

### Pos/Neg AUC

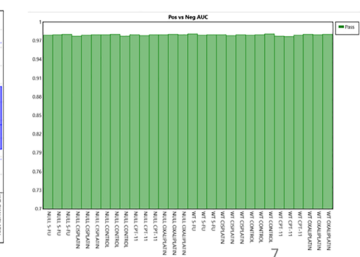

**Supplementary Figure 3: Internal control genes in microarray analysis.** (A) Housekeeping Beta-actin and GAPDH genes show no change across drug treatments and exhibit tightly clustered triplicates. p53 is lower in p53<sup>-/-</sup> cells, as expected. (B) Quality control was determined satisfactory for further analysis.

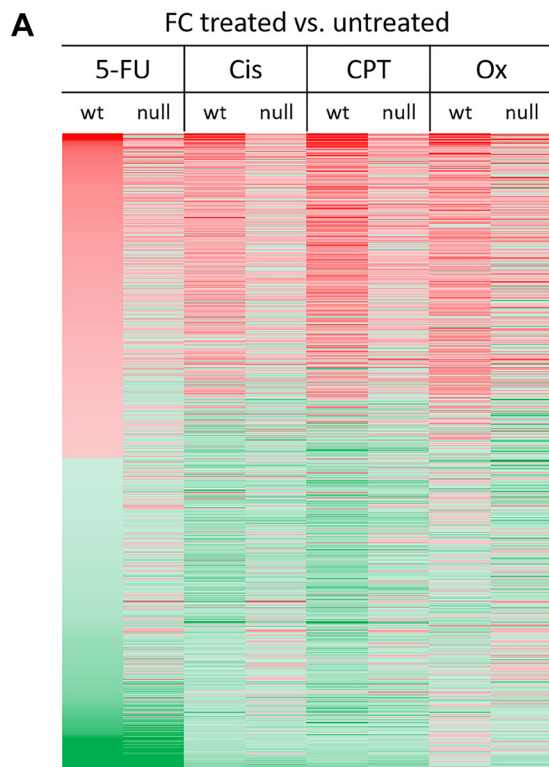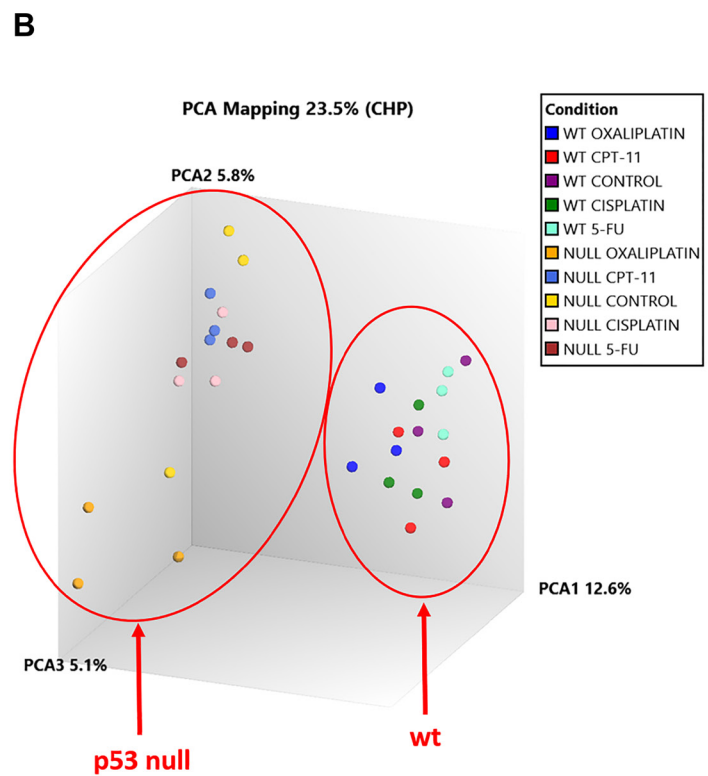

**Supplementary Figure 4: Global view of gene expression across HCT116 & HCT116 p53<sup>-/-</sup> cells treated with 5-FU, cisplatin, CPT-11, or oxaliplatin. (A)** The master list of transcripts regulated by at least one drug contained 961 genes. Regulation of the majority of these genes varied across drug and p53 status. **(B)** PCA mapping demonstrated clear separation of wild-type and p53<sup>-/-</sup> cells, as expected.



5-FU-specific signatures

p53-independent

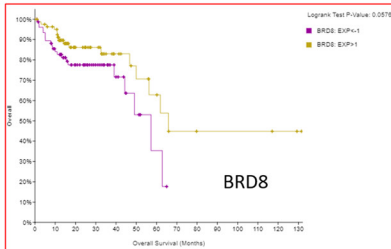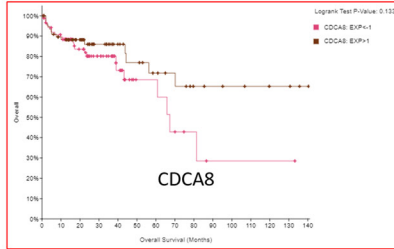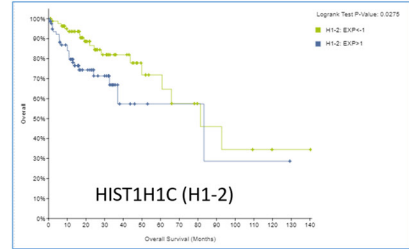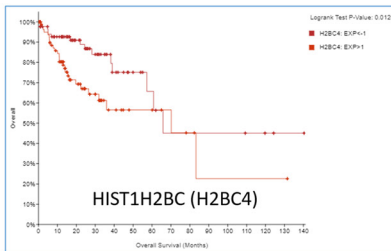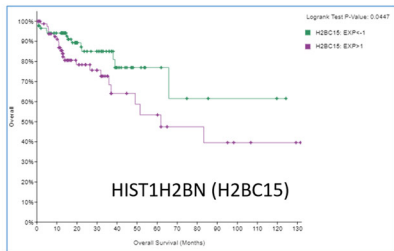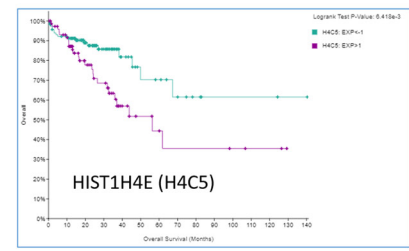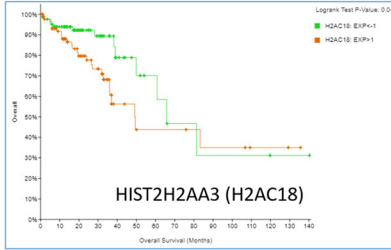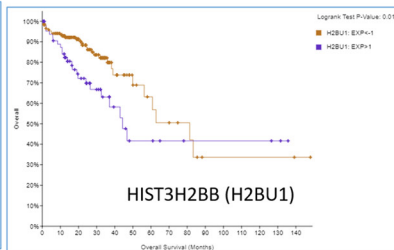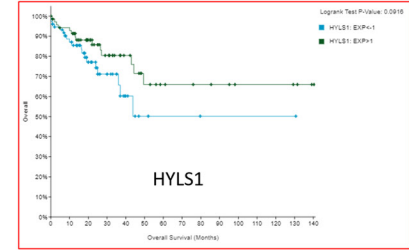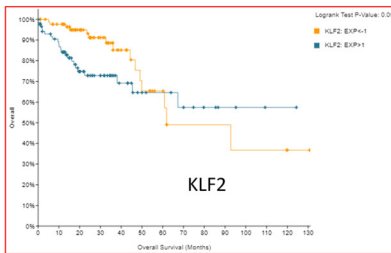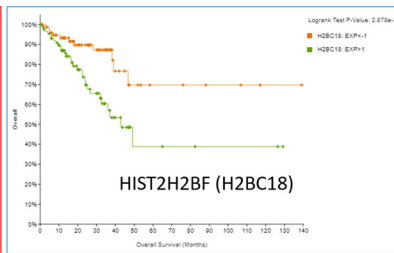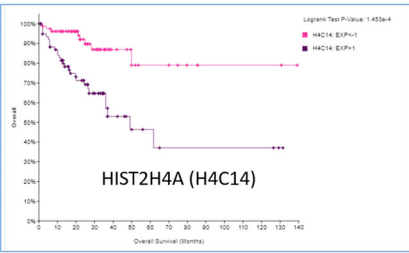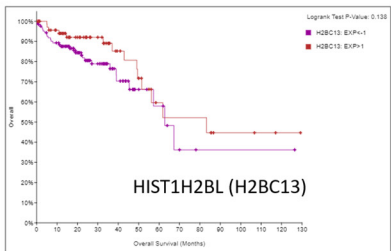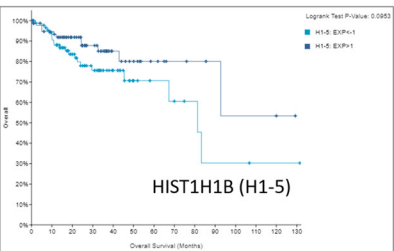

## 5-FU-specific signatures

### p53-dependent

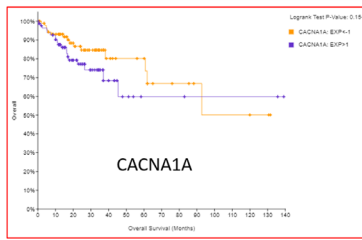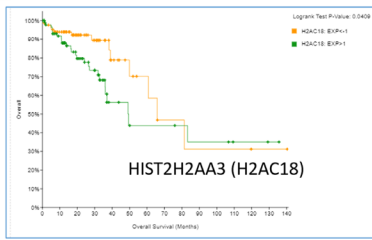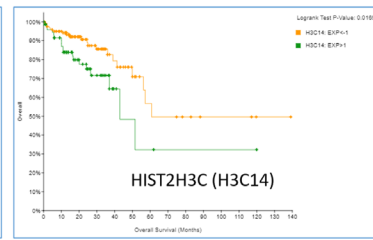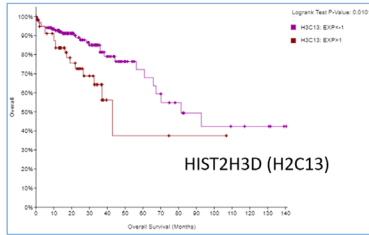

## CPT-11-specific signatures

### p53-independent

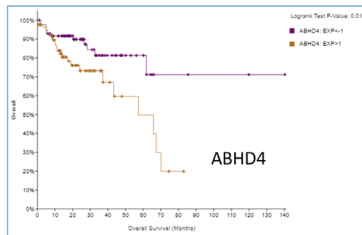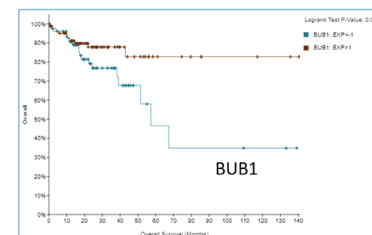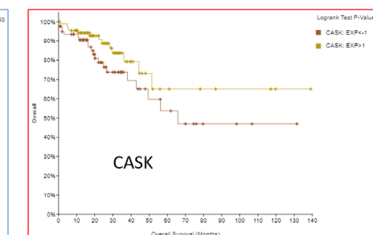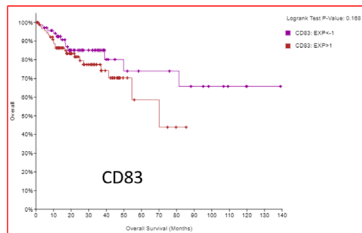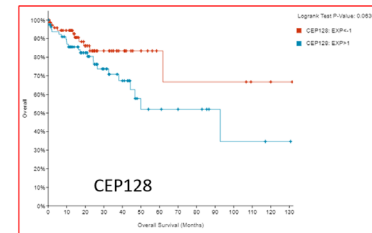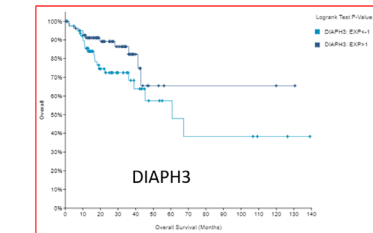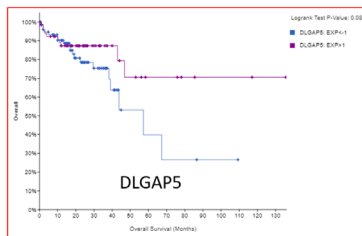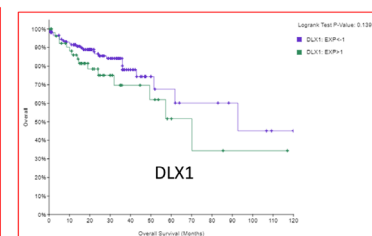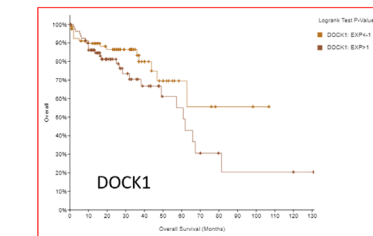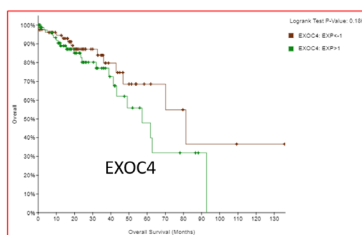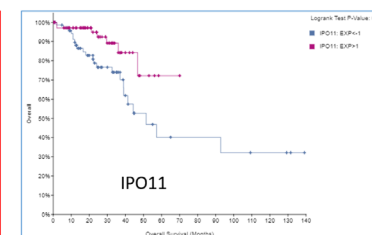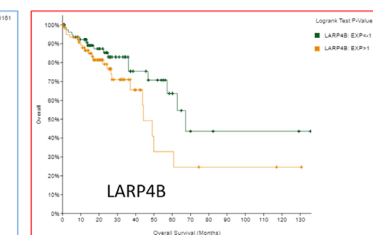

CPT-11-specific signatures

p53-independent

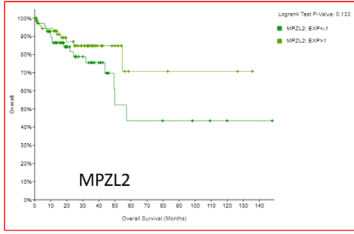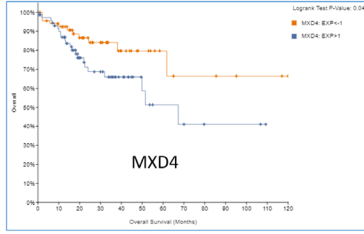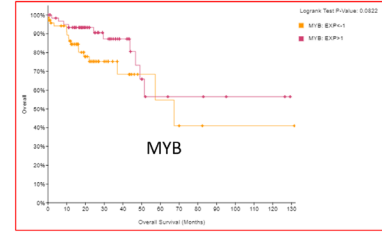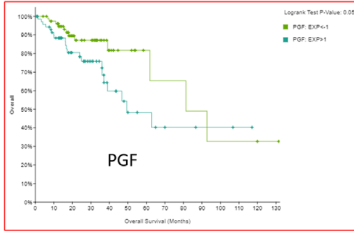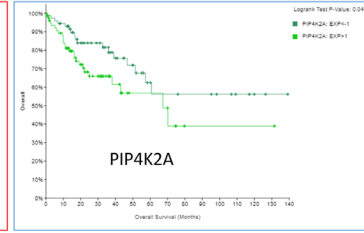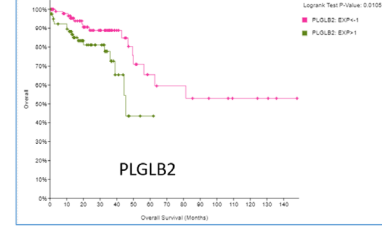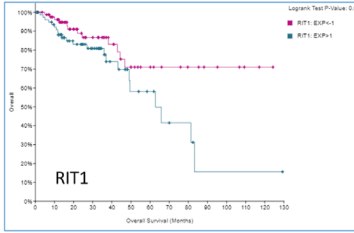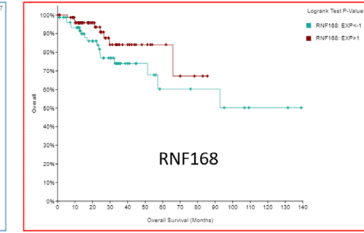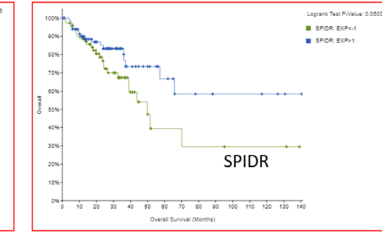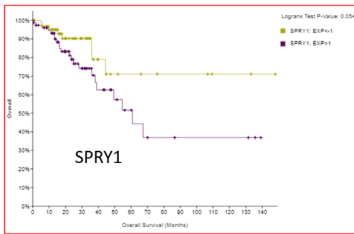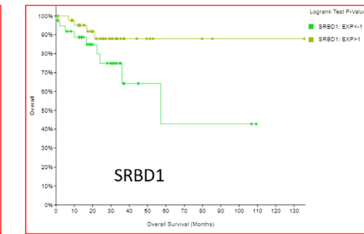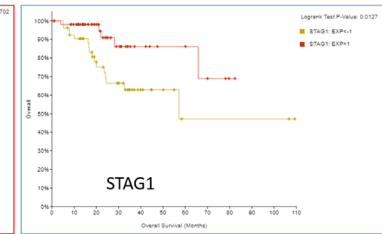

CPT-11-specific signatures

p53-independent

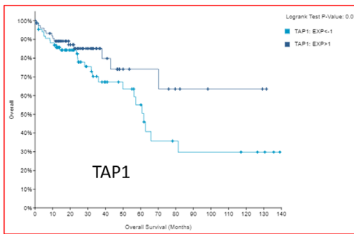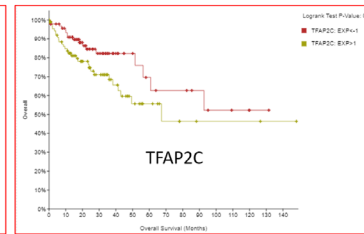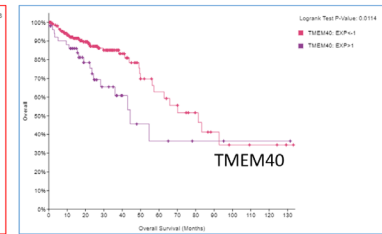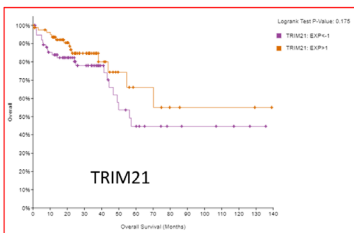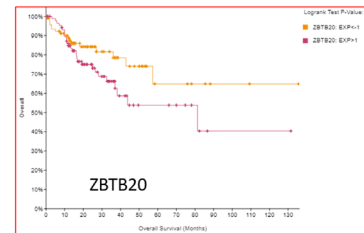

CPT-11-specific signatures

p53-dependent

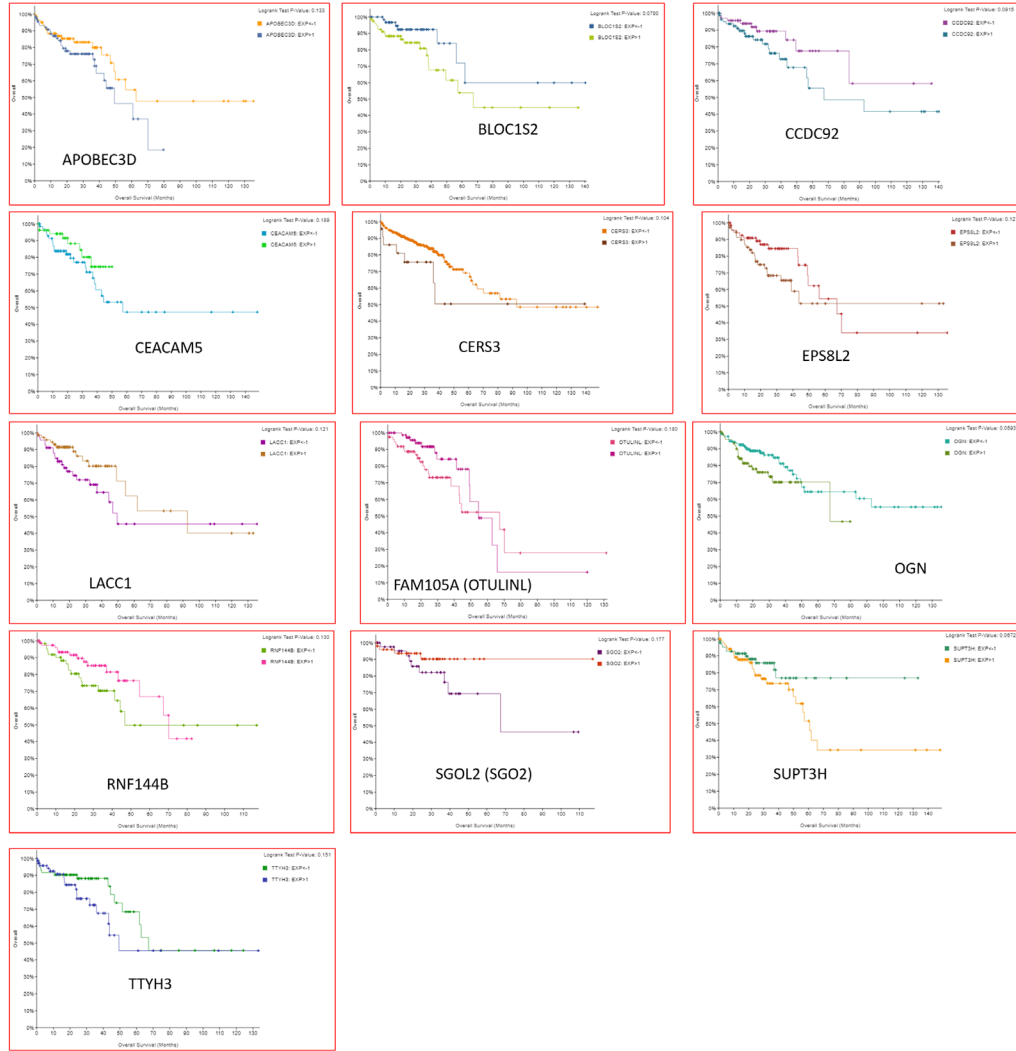

Oxaliplatin-specific p53-independent signature

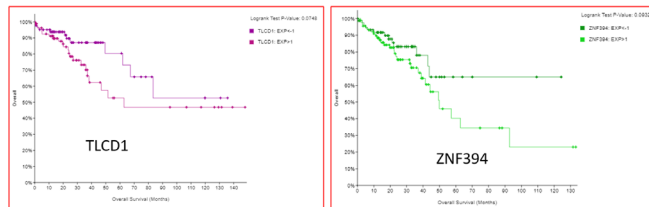

Cisplatin-specific p53-independent signature

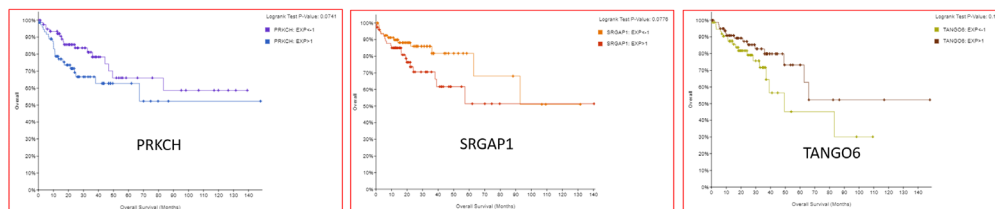

**Supplementary Figure 5: Subsets of transcriptomic signatures in response to 5-FU, CPT-11, oxaliplatin, and cisplatin correlate with patient outcomes in colorectal cancer.** TCGA (contains data on basal gene expression) was used to establish subsets of drug-specific signatures that correlated with patient outcomes. Difference in overall survival between patients with gene expression  $>1$  or  $<-1$  standard deviation from the mean was evaluated. Blue border = Logrank test  $p$ -value  $< 0.05$ . Red border = Logrank test  $p$ -value between  $0.05-0.2$ .

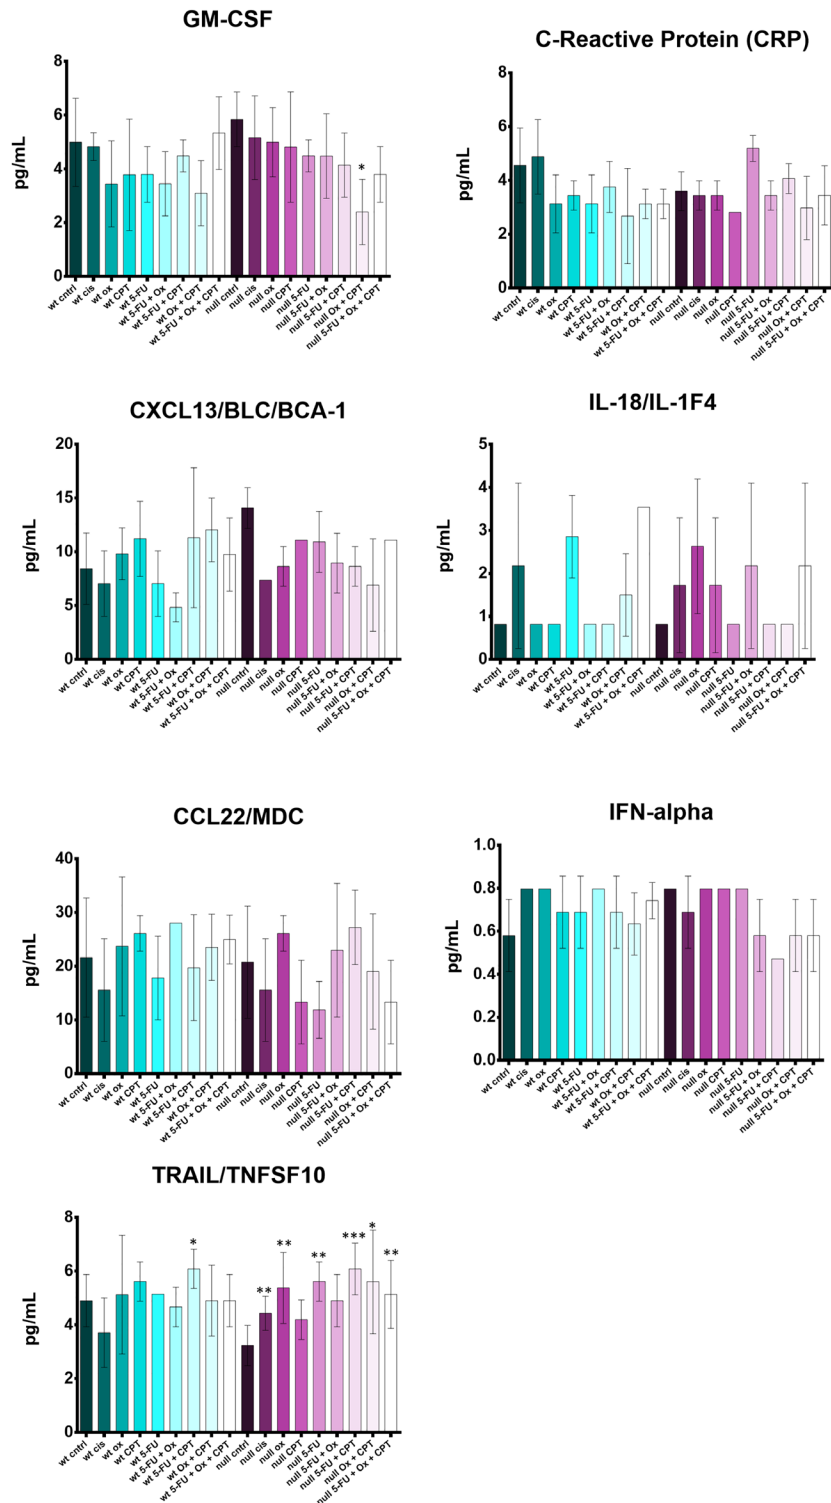

**Supplementary Figure 6: Cytokine profiling reveals no significant effects on GM-CSF, CRP, CXCL13, IL-18, or CCL22.** HCT116 and HCT116 p53<sup>-/-</sup> cells were treated at with the four drugs at their IC<sub>50</sub>s and combination treatment groups received 2–3 drugs, each at their individual IC<sub>50</sub> concentration for 48 hours. Cytokine levels in the cell supernatants were measured with the Luminex 200 platform and significant differences (*p*-value < 0.05 by one-way ANOVA) between control and treated groups was calculated.

**Supplementary Table 1: Complete gene signatures and additional information for each gene in the master list (Probeset IDs, statistics, descriptions, etc.).** See Supplementary Table 1
